# Supplementary material for: Molecular recognition and self-assembly mechanism of cocrystallization processes
Source: Royal Society of Chemistry journal article supplement (doi:10.1039/c7ce00713b), 2017-01-01
Supplement: c7ce00713b1.pdf [file c7ce00713b1.pdf]

# Molecular recognition and self-assembly mechanism of cocrystallization process

Na Wang,<sup>a</sup> Hongxun Hao, <sup>\*a,b</sup> Haijiao Lu <sup>a</sup> and Ruilin Xu<sup>a</sup>

<sup>a</sup> National Engineering Research Center of Industrial Crystallization Technology, School of Chemical Engineering and Technology, Tianjin University, Tianjin, 300072, P R China

<sup>b</sup> Collaborative Innovation Center of Chemical Science and Engineering, Tianjin, P R China

## Contents of Supporting Information:

|                                                      |           |
|------------------------------------------------------|-----------|
| <b>1. Experimental section.....</b>                  | <b>2</b>  |
| <b>1.1 Materials. ....</b>                           | <b>2</b>  |
| <b>1.2 Analytical methods &amp; equipments. ....</b> | <b>2</b>  |
| <b>1.3 Experimental section. ....</b>                | <b>3</b>  |
| <b>2. Figure Contents .....</b>                      | <b>5</b>  |
| <b>Figure S1.....</b>                                | <b>5</b>  |
| <b>Figure S2.....</b>                                | <b>5</b>  |
| <b>Figure S3.....</b>                                | <b>6</b>  |
| <b>Figure S4.....</b>                                | <b>7</b>  |
| <b>Figure S5.....</b>                                | <b>9</b>  |
| <b>Figure S6.....</b>                                | <b>10</b> |
| <b>Figure S7.....</b>                                | <b>13</b> |
| <b>Figure S8.....</b>                                | <b>14</b> |
| <b>3. Table contents.....</b>                        | <b>15</b> |
| <b>Table S1 .....</b>                                | <b>15</b> |
| <b>Table S2 .....</b>                                | <b>16</b> |
| <b>Table S3 .....</b>                                | <b>17</b> |
| <b>Table S4 .....</b>                                | <b>18</b> |
| <b>4. CCDC number .....</b>                          | <b>20</b> |

# 1. Experimental section

## 1.1 Materials.

Analytical-grade urea was supplied by Tianjin Fengchuan Chemical Reagent Technologies Co., Ltd. of China. Its mass fraction purity is higher than 99.0%. The *m*-cresol (MC) with mass fraction purity higher than 99.0% was purchased from Tianjin Yuanli Chemical Co., Ltd. of China. Its purity was determined by gas chromatograph. The analytical-grade toluene was purchased from Tianjin Guangfu Fine Chemical Research Institute. The dimethyl sulfoxide- $d_6$  (DMSO- $d_6$ , 99.9 atom % D, contains 0.03% (v/v) TMS) was purchased from SIGMA-ALDRICH Co., of USA. All chemicals were used without further purification. **Figure S1** indicates the molecular structures of urea and MC.

## 1.2 Analytical methods & equipments.

**1.2.1 X-ray diffraction.** Powder samples for X-ray powder diffraction (PXRD) analysis were piled on a glass slide. The patterns were collected by Rigaku D/MAX 2500 in  $2\theta$  range from  $2^\circ$  to  $50^\circ$  with a step size of  $0.02^\circ$ , voltage of 40 kV, and current of 100 mA. The single crystal X-ray diffraction data of MC\_U cocrystal were collected on a Rigaku-Rapid II diffractometer with Mercury2 CCD area-detector by using graphite-monochromatized Mo  $K\alpha$  radiation ( $\lambda = 0.71073$ ).

**1.2.2 Thermal analysis.** The thermodynamic properties of MC\_U cocrystal were determined by DSC (DSC 1/500, Mettler-Toledo, Switzerland) under protection of nitrogen atmosphere (dry nitrogen; purging rate: 50 mL/min). The samples (5-10 mg) were placed into 50  $\mu$ L aluminum pans, and the measurement temperature range was 25-100  $^\circ$ C with heating rate of 5  $^\circ$ C/min. The temperature deviations of the measurement were  $\pm 0.3$  K.

**1.2.3 Fourier transformed infrared spectrometer (FTIR).** Infrared spectra of urea, MC and MC\_U cocrystal were collected by using FTS6000 infrared instrument (Bio-rad). 1-2 mg samples and 200 mg pure KBr were thoroughly ground to smaller than 2  $\mu$ m and then homogeneously mixed by a mortar and pestle. The interaction between MC and urea was confirmed based on the wavenumbers.

**1.2.4  $^1\text{H}$ -nuclear magnetic resonance ( $^1\text{H}$  NMR).**  $^1\text{H}$  NMR analyses were performed on a Varian Inova 500 MHz Spectrometer (Palo Alto, CA, USA). Approximately 6-8 mg samples were dissolved into 0.6 ml DMSO- $d_6$ . The existence of dMCUs were confirmed based on the changes of the chemical shifts of protons among MC, urea and MC\_U cocrystal.

**1.2.5 Raman spectroscopy (Raman).** The *RamanRXN2™ HYBRID* analyzer (Kaiser Optical Systems, Inc. USA) which was equipped with both a *PhAT* probe head (for non-contact measurements) and a *MR* probe head (for direct measurements) was used to *in situ* monitor for the formation processes of MC\_U cocrystal. The Raman spectra were collected from 100 to 1890  $\text{cm}^{-1}$  at 1 min intervals during the isothermal process and 30 s intervals during the cooling process, respectively, and with 3 s exposure time. The *iC Raman™* software (METTLER TOLEDO) was used to collect and analyze the Raman data. The *MR* probe head with immersion optics was used to *in situ* monitor the formation of MC\_U cocrystal in solution while the *PhAT* probe head was used to collect the characteristic peaks for qualitative analysis.

**1.2.6 Attenuated total reflection Fourier transformed infrared spectroscopy (ATR-FTIR).** The ATR-FTIR ReactIR 45m (METTLER TOLEDO) which is designed to be flexible to use the full range of Comp probe and conduit technologies was used to *in situ* monitor the solute concentration. The *iC IR™* software was used for data acquisition and analysis. The measurement duration was set at 1 min and spectra were collected from 1000 to 1890  $\text{cm}^{-1}$ .

**1.2.7 Focused Beam Reflectance Measurement (FBRM).** A laboratory scale FBRM (model M400LF) system coupled with *iC FBRM™* software from METTLER TOLEDO was employed to measure the particles with a 2 s duration. The total counts of particles were used to monitor the appearance and disappearance of crystals.

### **1.3 Experimental section.**

#### **1.3.1 Cocrystal preparation.**

The single crystals of MC\_U cocrystal were grown by using slow cooling crystallization. Certain amounts of urea were added into *m*-cresol at 25 °C. Then, the suspension was heated until urea was completely dissolved to form a clear solution. At last, the solution was cooled down to 25 °C slowly. And MC\_U cocrystal seeds and toluene applied during the cooling process. The suitable single crystals were analyzed by single crystal X-ray diffractometer, DSC, FTIR,  $^1\text{H}$  NMR and Raman spectroscopy.

**1.3.2 Cooling cocrystallization.** Cooling cocrystallization experiments were performed in a 250 mL double-jacketed glass crystallizer as shown in **Figure S2**. The temperature of jacketed crystallizer was controlled by a thermostat, and the accuracy of temperature control is  $\pm 0.01$  °C. An overhead mechanical agitator was used to mix the solution. For all experiments, the agitation speed

was maintained at 300 rpm. Predetermined amounts of urea (24.00g) were completely dissolved in *m*-cresol (108.00g) without any other solvents in the crystallizer. At this ratio of materials, a clear solution can be obtained only when temperature is above 60 °C while it will remain as suspension at 60 °C. The suspension with urea particles was heated up to 76 °C rapidly and held at that temperature for 20 min to dissolve all urea solid particles. Then, the solution was cooled down to 60 °C rapidly. In the final step cooling process, the solution was cooled down to 50 °C at cooling rate of 0.1 °C/min. When the temperature dropped down to 59.7 °C, a burst of nucleation occurred. Then, the crystallizer was held at 50 °C for 30 min. The obtained suspension was filtered and the filtered cake was washed with appropriate amount of toluene, and then dried at ambient conditions for 24 hours. The final products were analyzed by PXRD, DSC, FTIR and <sup>1</sup>H NMR. During these experiments, Raman, ATR-FTIR spectroscopic analyzers and FBRM were used in combination to *in situ* monitor the cooling cocrystallization processes.

**1.3.3 Dimer verification experiments.** To verify the hypothesis that *m*-cresol-urea dimers (dMCUs) were firstly formed in solution before the formation of MC\_U cocrystals, the following experiments which are similar to the cooling cocrystallization experiments were designed. And the devices for the dMCUs verification experiment are the same with the cooling cocrystallization experiments, as showed in **Figure 2**. In the experiments, in order to make the experimental phenomena and trends more prominent, 42.17g MC\_U cocrystals were added into 90.00g *m*-cresol at 35 °C with agitation speed of 300 rpm. With this ratio of cocrystal to *m*-cresol, the saturation point of the solution should be 60 °C. The system was maintained at 35°C for 75 min to make the system to reach stability. Then, the system was rapidly heated up to 65 °C and was held at 65 °C for 20 min to dissolve all particles. Next, the clear solution was cooled down to 60 °C in 10 min and held for 30 min. At last, the clear solution was cooled down to 55 °C at cooling rate of 0.05 °C/min, then down to the final temperature 35 °C at cooling rate of 0.1 °C/min. When the temperature dropped down to 56.7 °C, flaky crystals appeared slowly. The first step cooling rate is slower than the second step, so as to avoid the occurrence of burst nucleation. The process was also *in situ* monitored by Raman, ATR-FTIR spectroscopy and FBRM.

In order to confirm the existence of dMCUs and to find the disappearing and appearing temperatures of dMCUs upon heating or cooling, we have also designed a cycle procedure of heating and cooling on the basis of the above experiments and the process was also *in situ* monitored by ATR-FTIR

spectroscopy and FBRM.

## 2. Figure Contents

Figure S1

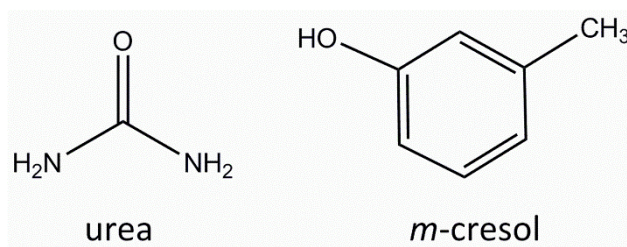

Figure S1. Molecular structures of urea and *m*-cresol

Figure S2

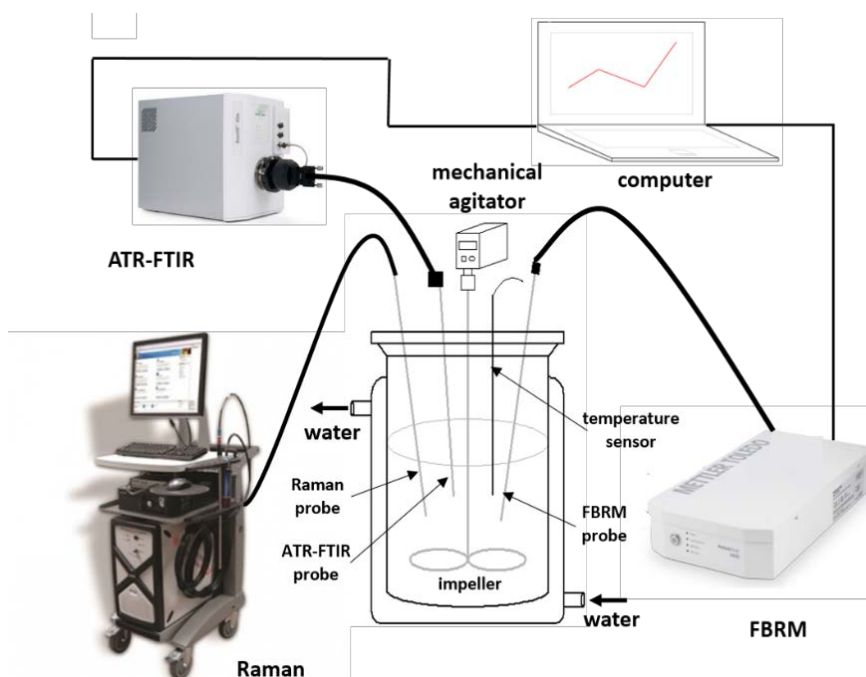

Figure S2. A schematic diagram of the experimental setup consisting of Raman, ATR-FTIR spectroscopic analysers and FBRM.

Figure S3

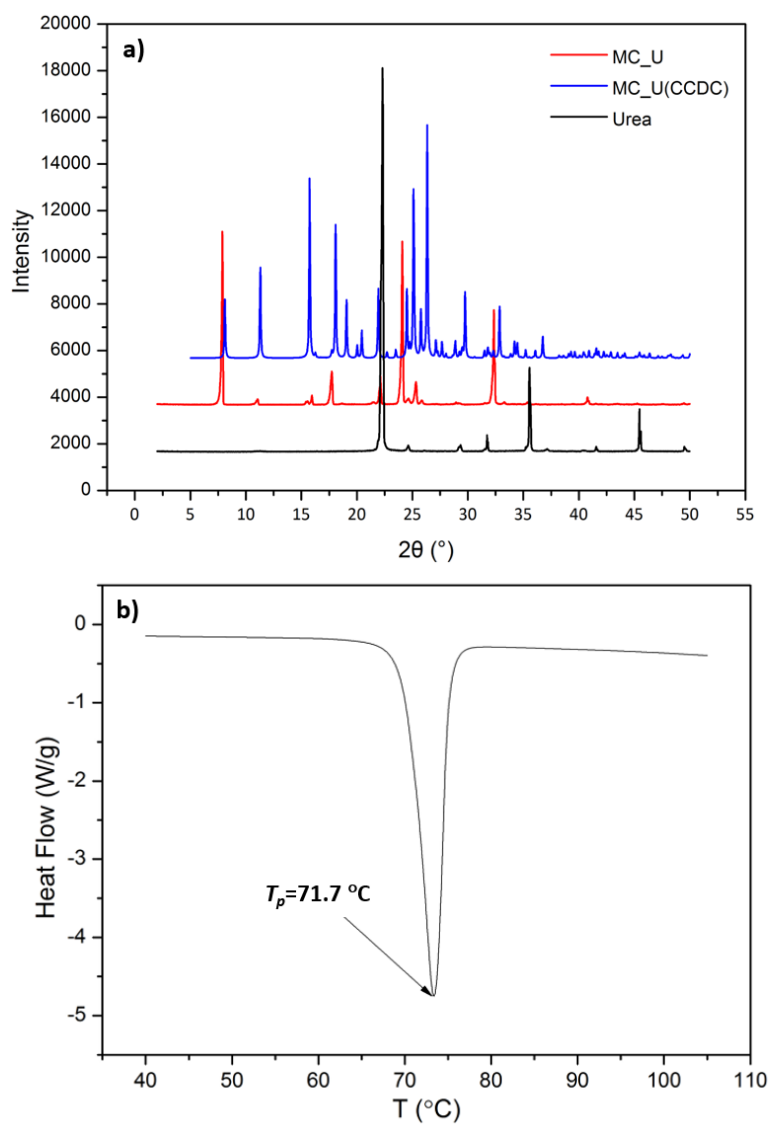

Figure S3. PXRD patterns and DSC thermogram of MC\_U cocrystal. a) shows the PXRD pattern of urea, MC\_U cocrystal (CCDC) calculated by single crystal crystallography and MC\_U cocrystal obtained by experiments, respectively. b) shows the DSC data of MC\_U cocrystal with peak melting temperature ( $T_p$ ) of  $71.7^\circ\text{C}$ .

Figure S4

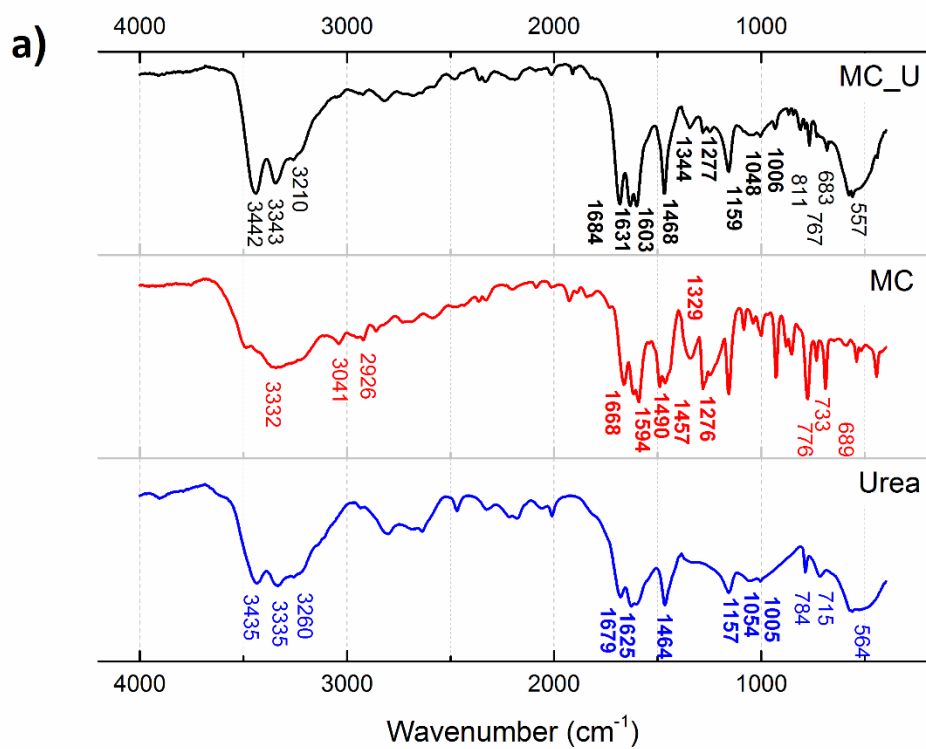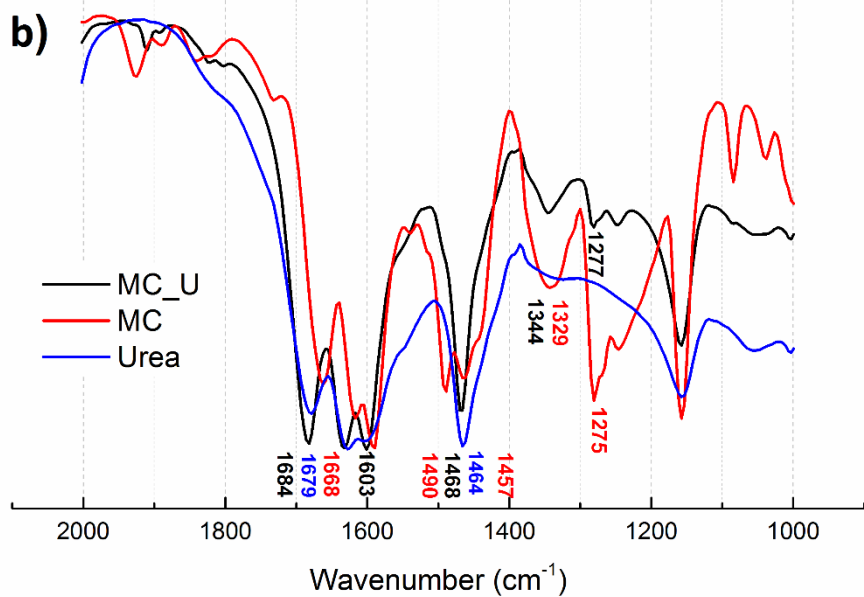

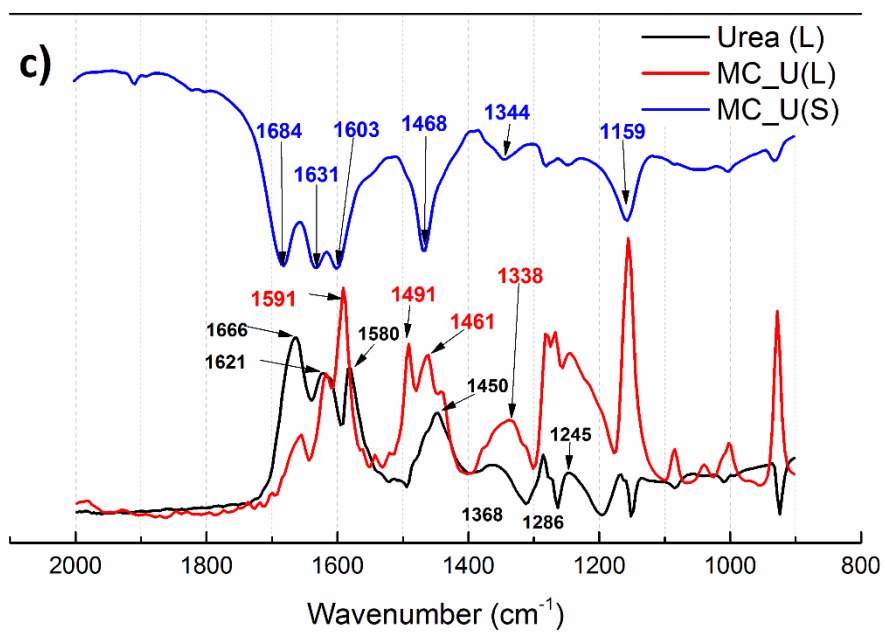

Figure S4. FTIR spectra of MC\_U cocrystal, MC and urea respectively. a) displays the solid FTIR spectra of MC, urea and MC\_U cocrystal from 4000 to 400  $\text{cm}^{-1}$ ; b) displays the magnified FTIR spectra from 2000 to 1000  $\text{cm}^{-1}$ ; and c) shows the characteristic absorption peaks corresponding to solid FTIR (marked with S) and liquid ATR-FTIR data (marked with L).

Figure S5

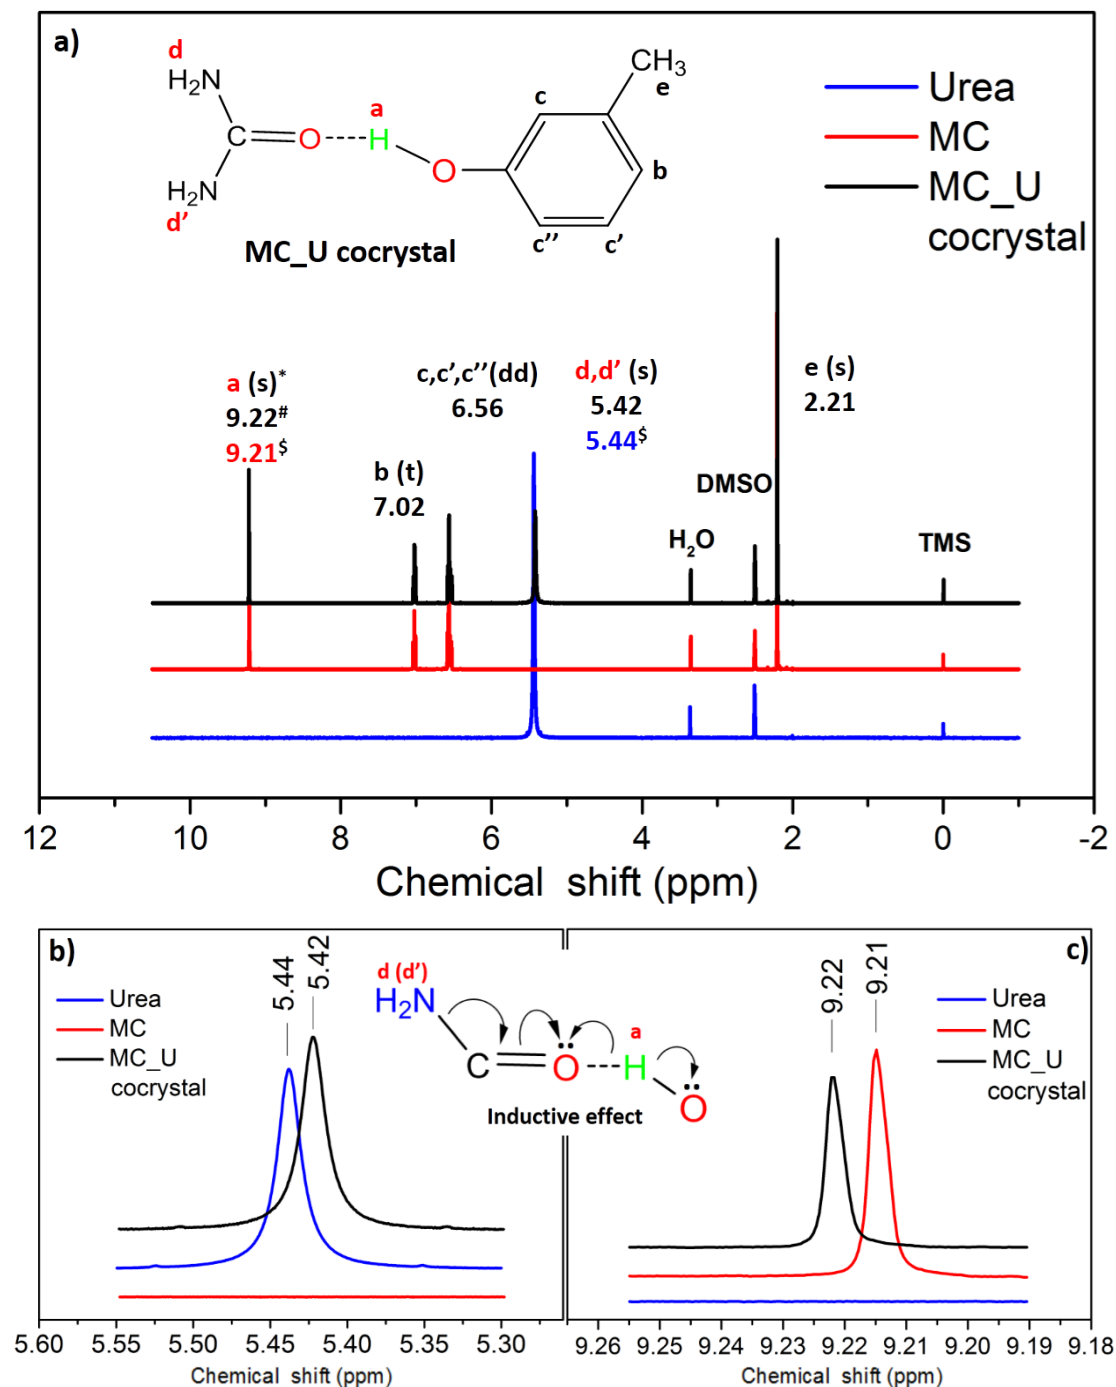

Figure S5. <sup>1</sup>H NMR spectra of MC\_U cocrystal, MC and urea in DMSO-d<sub>6</sub>, respectively. a) displays the <sup>1</sup>H NMR spectra of MC, urea and MC\_U cocrystal with the schematic diagram of MC\_U cocrystal: the characteristic chemical shift of MC\_U cocrystal, -OH of MC and -NH<sub>2</sub> of urea were marked by different colors; <sup>#</sup> indicates the chemical shift values of characteristic protons of MC\_U cocrystal; <sup>§</sup> indicates the chemical shift of active hydrogen and the value in red is the -OH of MC while the value in blue is the -NH<sub>2</sub> of urea. b) displays the different chemical shift of -NH<sub>2</sub> in urea and MC\_U cocrystal, respectively. and c) shows the different chemical shift of -OH in MC and MC\_U cocrystal, respectively. The schematic diagram of "inductive effect" which is shown between b) and c) diagrams can explain the cause of the phenomenon and the deviation of chemical shift.

<sup>1</sup>H NMR (MC, 500 MHz, [D<sub>6</sub>]DMSO, 25 °C, TMS): δ = 9.21 (s, 1H; OH), 7.03 (t, 1H; =CH-), δ = 6.56 (dd, 3H; =CH-), 2.21 ppm (s, 3H; CH<sub>3</sub>).

<sup>1</sup>H NMR (Urea, 500 MHz, [D<sub>6</sub>]DMSO, 25 °C, TMS): δ = 5.44 ppm (s, 4H; NH<sub>2</sub>).

Figure S6

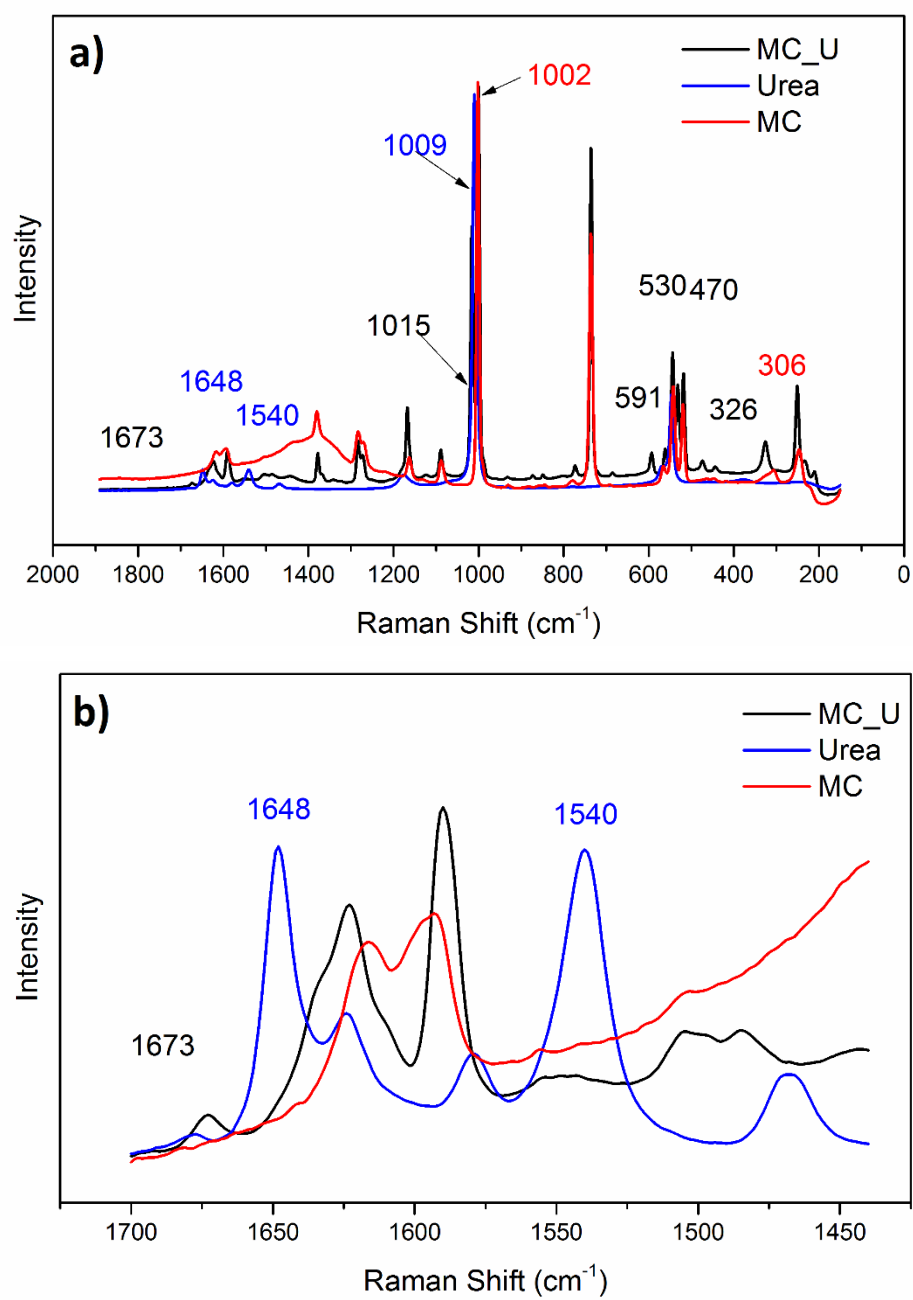

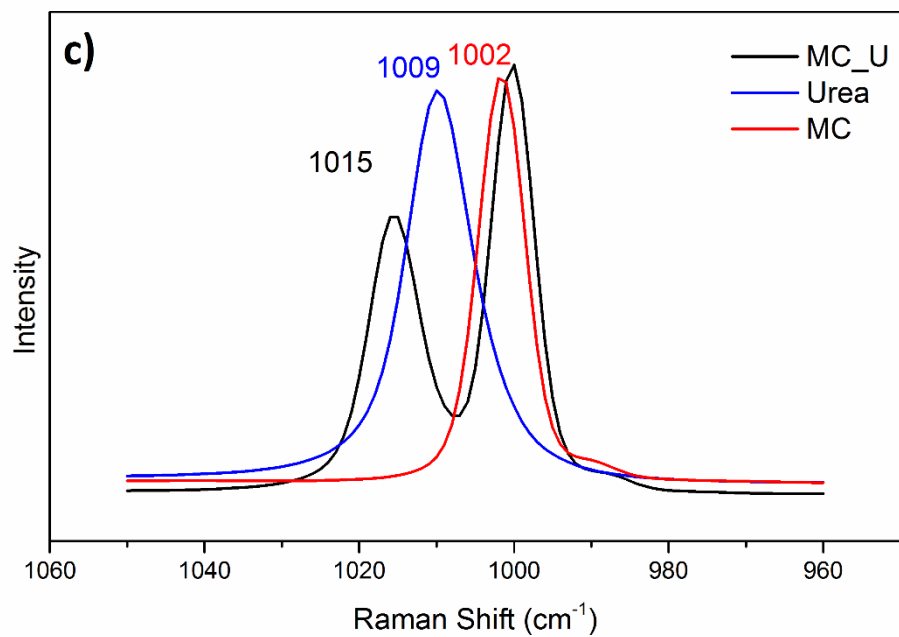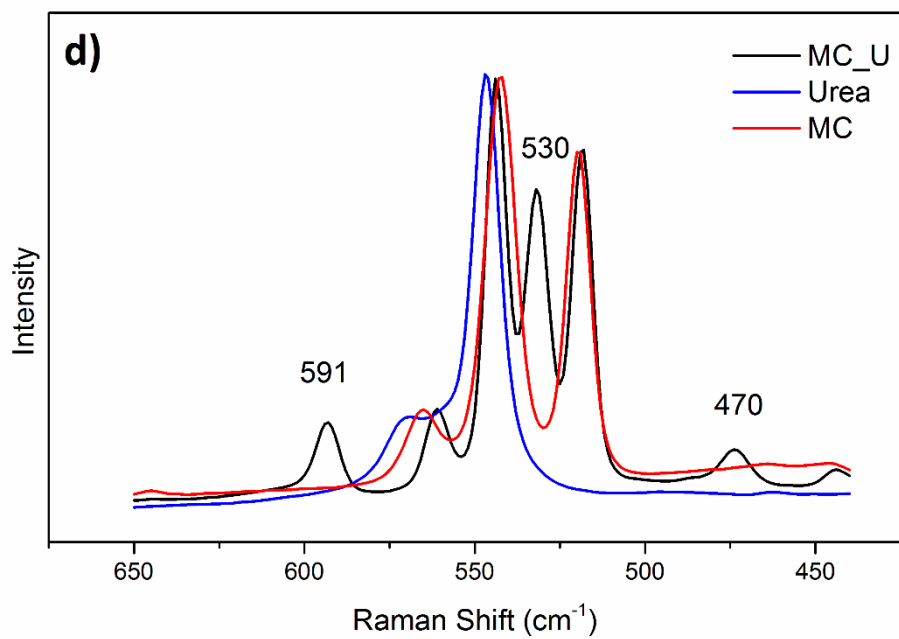

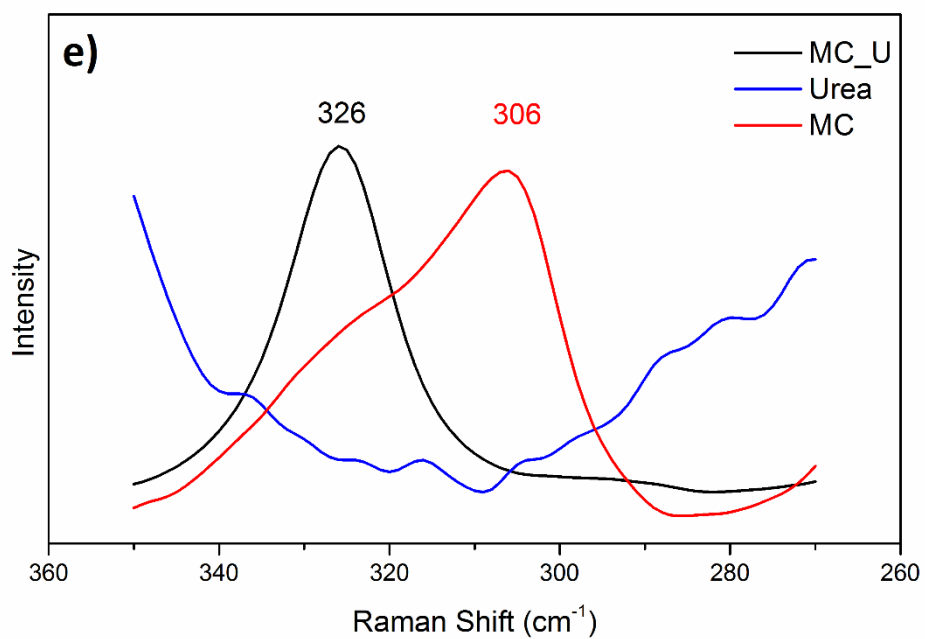

Figure S6. Raman spectra of urea, MC and MC\_U cocrystal in the range of a) 1890-150  $\text{cm}^{-1}$ ; b) 1700-1450  $\text{cm}^{-1}$ ; c) 1050-960  $\text{cm}^{-1}$ ; d) 650-425  $\text{cm}^{-1}$  and e) 350-270  $\text{cm}^{-1}$ .

Figure S7

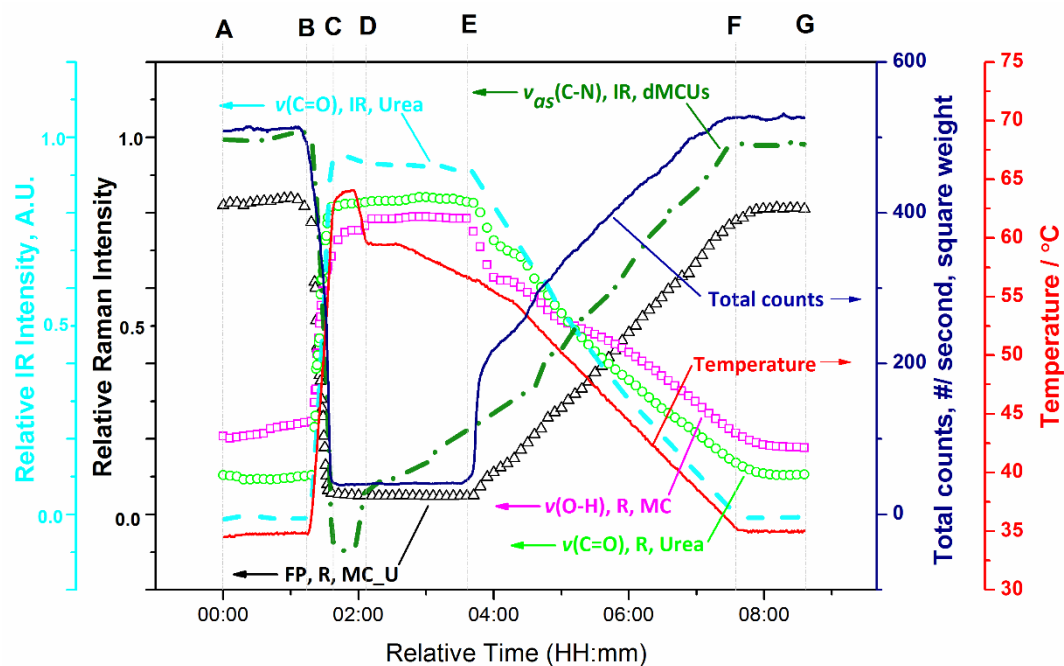

Figure S7. Changing trends of Raman, ATR-FTIR and FBRM data during cooling crystallization process of dimer verification experiments.

R: Raman data, IR: ATR-FTIR data, FP: fingerprint region of MC\_U cocrystal

Figure S8

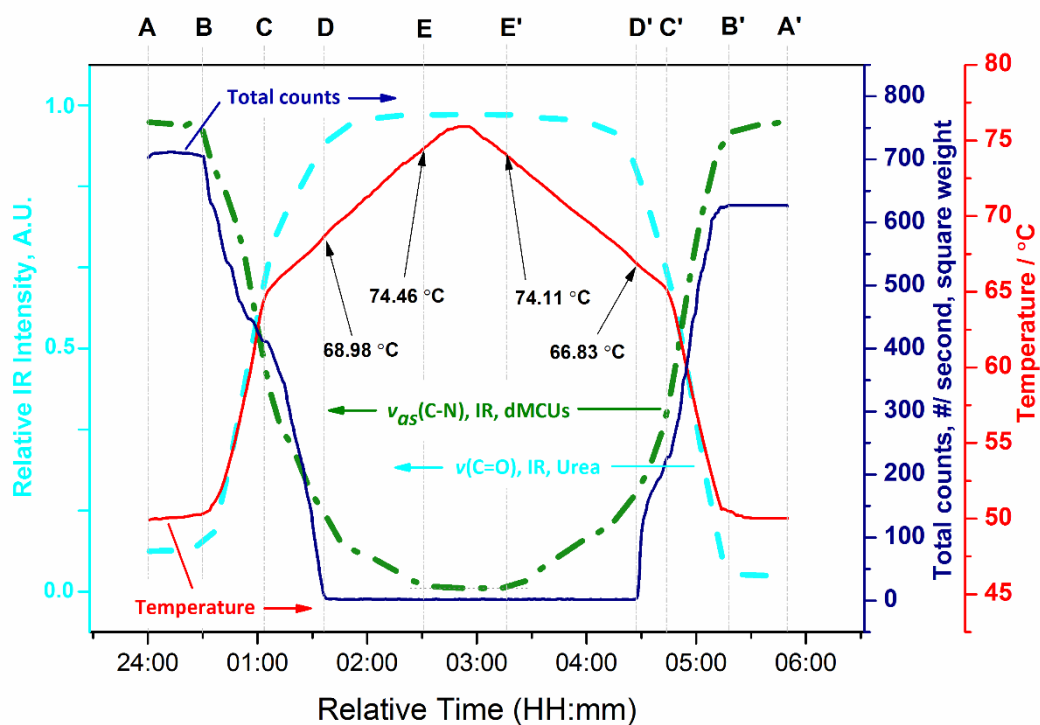

Figure S8. Changing trends of ATR-FTIR and FBRM data during heating and cooling processes for investigating the effect of temperature on formation of dMCUs: dMCUs disappear when temperature is higher than 74.46 °C while dMCUs are formed when temperature is lower than 74.11 °C.

### 3. Table contents

Table S1

| Table S1. Crystal Data and Structure Refinement |                                                                                                         |
|-------------------------------------------------|---------------------------------------------------------------------------------------------------------|
| empirical formula                               | C <sub>8</sub> H <sub>12</sub> O <sub>2</sub> N <sub>2</sub>                                            |
| formula weight                                  | 168.20 g/mol                                                                                            |
| temperature                                     | 123 K                                                                                                   |
| wavelength                                      | 0.71073 Å                                                                                               |
| crystal system, space group                     | orthorhombic, <i>Pbca</i> (61)                                                                          |
| unit cell dimensions                            | a = 11.2502(5) Å, alpha = 90 deg<br>b = 7.1880(4) Å, beta = 90 deg<br>c = 21.7868(15) Å, gamma = 90 deg |
| Volume                                          | 1761.82(17) Å <sup>3</sup>                                                                              |
| Z, calculated density                           | 8, 1.26817 g/cm <sup>3</sup>                                                                            |
| F(000)                                          | 720                                                                                                     |
| $\mu$                                           | 0.092 mm <sup>-1</sup>                                                                                  |
| limiting indices                                | -12 ≤ h ≤ 13, -4 ≤ k ≤ 8, -18 ≤ l ≤ 25                                                                  |
| completeness to theta = 25.010                  | 99.80%                                                                                                  |
| $T_{\min}/T_{\max}$                             | 0.989/0.995                                                                                             |
| data/restraints/parameters                      | 2036/0/111                                                                                              |
| goodness-of-fit on $\hat{F}_2$                  | 1.098                                                                                                   |
| R-Factor (%)                                    | 5.52                                                                                                    |

Table S2

Table S2. Hydrogen Bonds For MC\_U Cocrystal

| D-H...A            | <i>d</i> (D-H) | <i>d</i> (H...A) | <i>d</i> (D...A) | ∠(DHA) | symop_for_A      |
|--------------------|----------------|------------------|------------------|--------|------------------|
| O(11)-H(11)...O(1) | 0.82           | 1.91             | 2.710(2)         | 164    | .                |
| N(3)-H(3A)...O(1)  | 0.86           | 2.07             | 2.929(2)         | 173    | 3/2-x, -1/2+y, z |
| N(4)-H(4A)...O(1)  | 0.86           | 2.09             | 2.946(2)         | 171    | 3/2-x, 1/2+y, z  |
| N(3)-H(3B)...O(11) | 0.86           | 2.20             | 2.969(2)         | 148    | -1/2+x, y, 1/2-z |
| N(4)-H(4B)...O(11) | 0.86           | 2.26             | 3.009(2)         | 146    | -1/2+x, y, 1/2-z |

Table S3

Table S3. The Characteristic Frequencies (cm<sup>-1</sup>) of Urea, *m*-Cresol and MC\_U

|                | Frequencies<br>(cm <sup>-1</sup> ) |       | Assignments              |    | Frequencies<br>(cm <sup>-1</sup> ) |       | Assignments                |      | Frequencies<br>(cm <sup>-1</sup> ) |       | Assignments                         |
|----------------|------------------------------------|-------|--------------------------|----|------------------------------------|-------|----------------------------|------|------------------------------------|-------|-------------------------------------|
|                | IR                                 | Raman |                          |    | IR                                 | Raman |                            |      | IR                                 | Raman |                                     |
| U <sup>a</sup> | 3435                               |       | $\nu_{as}(\text{NH}_2)$  | MC | 3332                               |       | $\nu(\text{OH})$           | MC_U | 3442                               |       | $\nu_{as}(\text{NH}_2)$             |
|                | 3335                               |       | $\nu_s(\text{NH}_2)$     |    | 3041                               |       | $\nu(\text{C-H})$          |      | 3343                               |       | $\nu_s(\text{NH}_2)$                |
|                | 3260                               |       |                          |    | 2926                               |       | $\nu(\text{CH}_3)$         |      | 3210                               |       | $\nu(\text{OH})$                    |
|                | 1679                               | 1678  |                          |    | 1668                               |       | $\gamma(\text{C-H})$       |      | 1684                               | 1673  | $\nu(\text{C=O})$                   |
|                |                                    | 1648  | $\nu(\text{C=O})$        |    |                                    | 1617  |                            |      | 1655 <sup>L</sup>                  |       |                                     |
|                | 1666 <sup>L</sup>                  |       |                          |    | 1594                               | 1593  | $\nu(\text{C=C})$          |      | 1631                               | 1623  | $\delta_s(\text{NH}_2)$             |
|                | 1625                               | 1624  |                          |    | 1490                               |       |                            |      | 1618 <sup>L</sup>                  |       |                                     |
|                | 1621 <sup>L</sup>                  |       | $\delta_s(\text{NH}_2)$  |    | 1457                               |       | $\delta_{as}(\text{CH}_3)$ |      | 1603                               |       |                                     |
|                | 1614 <sup>L</sup>                  |       |                          |    |                                    | 1380  | $\delta_s(\text{CH}_3)$    |      | 1591 <sup>L</sup>                  | 1590  | $\nu(\text{C=C})$                   |
|                | 1580 <sup>L</sup>                  | 1579  |                          |    | 1329                               |       |                            |      | 1544                               |       | $\nu(\text{C=O})$                   |
|                |                                    | 1540  | $\nu(\text{C=O})$        |    | 1275                               | 1271  | $\nu(\text{C-O})$          |      | 1491 <sup>L</sup>                  |       |                                     |
|                | 1464                               | 1468  | $\nu_{as}(\text{C-N})$   |    |                                    | 1163  | $\nu(\text{C=C})$          |      | 1468                               | 1484  | $\nu_{as}(\text{C-N})$              |
|                | 1450 <sup>L</sup>                  |       |                          |    |                                    | 1002  | $\nu(\text{C=C})$          |      | 1461 <sup>L</sup>                  |       |                                     |
|                |                                    | 1176  | $\rho_s(\text{NH}_2)$    |    |                                    |       |                            |      | 1442 <sup>L</sup>                  |       |                                     |
|                | 1167 <sup>L</sup>                  |       |                          |    | 776                                | 780   |                            |      | 1344                               | 1341  |                                     |
|                | 1157                               |       |                          |    | 733                                | 736   | meta                       |      | 1338 <sup>L</sup>                  |       | $\nu(\text{C-O})$                   |
|                |                                    |       | $\rho_{as}(\text{NH}_2)$ |    | 689                                | 690   |                            |      | 1277                               | 1283  |                                     |
|                | 1054                               |       |                          |    |                                    | 445   | $\nu(\text{C-O})$          |      | 1267 <sup>L</sup>                  |       |                                     |
|                | 1005                               | 1010  | $\nu_s(\text{C-N})$      |    |                                    | 306   | $\nu(\text{O-H})$          |      | 1159                               | 1167  | $\rho_s(\text{NH}_2)$               |
|                | 784                                | 781   | $\omega(\text{C=O})$     |    |                                    |       |                            |      | 1155 <sup>L</sup>                  |       |                                     |
|                | 715                                | 701   | $\tau_{as}(\text{NH}_2)$ |    |                                    |       |                            |      | 1059 <sup>L</sup>                  |       |                                     |
|                |                                    |       | $\rho(\text{C=O})$       |    |                                    |       |                            |      | 1048                               | 1089  |                                     |
|                | 564                                | 570   |                          |    |                                    |       |                            |      | 1039 <sup>L</sup>                  |       | FP region <sup>b</sup>              |
|                |                                    | 547   |                          |    |                                    |       |                            |      | 1006                               | 1015  |                                     |
|                |                                    |       |                          |    |                                    |       |                            |      | 1000                               | 1000  |                                     |
|                |                                    |       |                          |    |                                    |       |                            |      | 811                                |       |                                     |
|                |                                    |       |                          |    |                                    |       |                            |      | 767                                | 735   | meta                                |
|                |                                    |       |                          |    |                                    |       |                            |      | 683                                | 685   |                                     |
|                |                                    |       |                          |    |                                    |       |                            |      |                                    | 591   | $\text{C=O}\cdots\text{H}-\text{O}$ |
|                |                                    |       |                          |    |                                    |       |                            |      |                                    | 444   | $\nu(\text{C-O})$                   |
|                |                                    |       |                          |    |                                    |       |                            |      |                                    | 325   | $\nu(\text{O-H})$                   |

**Symbols**

$\nu$ : Stretching

$\delta$ : Deformation Vibration

$\tau$ : Torsion

$\gamma$ : Out-of-Plane Bending

$\beta$ : In-Plane Bending

$\omega$ : Out-of-Plane Waging

$\rho$ : In-Plane Waging

**Subscript**

$s$ : Symmetric

$as$ : Antisymmetric

**Superscript**

<sup>L</sup>: ATR-FTIR data

<sup>a</sup>: Urea

<sup>b</sup>: fingerprint region

---

**Table S4**

With the help of MestReNova software which is used for analysis of NMR data, we get the following Table S4 to explain the dMCUs. Samples of 7.1 mg (MC\_U cocrystal), 7.0 mg (MC) and 7.3 mg (urea) were dissolved into 0.6 ml of DMSO-d<sub>6</sub> (0.03% (v/v) TMS), respectively. The original and normalized NMR data are shown in Table S4. The normalization process for the “normalized 2 data” in the last column of the Table S4 is as follows:

Firstly, the concentrations of the three samples were normalized to the same concentration.

Secondly, normalized data of MC and urea were converted to the value of the same scale with MC\_U cocrystal, that is, the “normalized data” of MC will be multiplied by 64.29% to get the “normalized 2 data” column, while the “normalized data” of urea will be multiplied by 35.71% to get the corresponding “normalized 2 data”, in the column “Normalized 2”. And 64.29% and 35.71% are the proportion of MC and urea in MC\_U cocrystal, respectively.

Take the OH in MC for example, the “normalized 2 data” is 12.16.

And  $12.16 = 18.65 * 7.1 / 7.0 * 64.19\%$ .

In <sup>1</sup>H NMR, the peak area is proportional to the number of protons and the ratio of the peak area is the height of the integral curve (T. Pan, Y. Zhang and Suchman, Spectrum analytical method, East China University of Science and Technology Press, Shanghai, 2009.). From the Normalized column and the Component 1 (MC\_U cocrystal) in Table S4, we can know that the ratio of protons in the group is 1:1:3:4:3 (11.30 : 11.51 : 33.74 : 52.27 : 36.96  $\approx$  1:1:3:4:3 = (1H; OH) : (1H; =CH-) : (3H; =CH-) : (4H; NH<sub>2</sub>) ; (3H; CH<sub>3</sub>)). And the ratio means that MC\_U cocrystal solution contains equimolar amounts of MC and urea. Therefore, the dimers (dMCUs) are present in the solution. What's more, by comparing Component 2 and 3 with Component 1 in the Normalized 2 column, we can know that the normalized values are very close , for example,  $12.16/11.30 \approx 1$  and  $55.30/52.27 \approx 1$ . It means that dMCUs content only one part of MC and one part of urea. So, we can conclude that the *m*-cresol-urea dimers (dMCUs), rather than trimers and tetramers, exist in solution even before MC\_U cocrystals appear as a solid.

**Table S4. The original and normalized <sup>1</sup>H NMR data of Urea, *m*-Cresol and MC\_U**

| Components |                   | Assignment             | Chemical Shift<br>/ppm | Range <sup>a</sup><br>/ppm | Normalized <sup>b</sup> | Normalized 2 <sup>c</sup> |
|------------|-------------------|------------------------|------------------------|----------------------------|-------------------------|---------------------------|
| 1          | MC_U<br>cocrystal | s, 1H; OH              | 9.22                   | 9.24 ~ 9.20                | 11.30                   | 11.30                     |
|            |                   | t, 1H; =CH-            | 7.02                   | 7.06 ~ 6.99                | 11.51                   | 11.51                     |
|            |                   | dd, 3H; =CH-           | 6.56                   | 6.61 ~ 6.51                | 33.74                   | 33.74                     |
|            |                   | s, 4H; NH <sub>2</sub> | 5.42                   | 5.54 ~ 5.30                | 52.27                   | 52.27                     |
|            |                   | s, 3H; CH <sub>3</sub> | 2.21                   | 2.23 ~ 2.19                | 36.96                   | 36.96                     |
|            | TMS               | -                      | 0.00                   | 0.02 ~ -0.02               | 1.00 <sup>d</sup>       | 1.00 <sup>d</sup>         |
| 2          | MC                | s, 1H; OH              | 9.21                   | 9.23 ~ 9.19                | 18.65                   | 12.16                     |
|            |                   | t, 1H; =CH-            | 7.03                   | 7.06 ~ 6.99                | 19.12                   | 12.47                     |
|            |                   | dd, 3H; =CH-           | 6.56                   | 6.61 ~ 6.51                | 55.21                   | 36.00                     |
|            |                   | s, 3H; CH <sub>3</sub> | 2.21                   | 2.23 ~ 2.19                | 60.60                   | 39.52                     |
|            | TMS               | -                      | 0.00                   | 0.02 ~ -0.02               | 1.00 <sup>d</sup>       | -                         |
| 3          | Urea              | s, 4H; NH <sub>2</sub> | 5.44                   | 5.55 ~ 5.32                | 159.19 <sup>e</sup>     | 55.30                     |
|            | TMS               | -                      | 0.00                   | 0.02 ~ -0.02               | 1.00 <sup>d</sup>       | -                         |

<sup>a</sup>: Integral range of a certain characteristic peak

<sup>b</sup>: Normalized values compared with the standard peak is processed by MestReNova software. In this process, the peak of TMS was selected as the standard peak.

<sup>c</sup>: Normalized values at the same concentration compared with the standard peak

<sup>d</sup>: Standard peak, and the normalized value of the standard peak is 1.00.

<sup>e</sup>: The relative content of TMS is too low and the relative content of urea is too high, resulting in the normalized value of NH<sub>2</sub> in urea more than 100.

---

#### **4. CCDC number**

1541360
